# Supplementary material
Source: PubMed Central journal article supplement (PMC2761224)
Supplement: NIHMS27331-supplement-suppdata.pdf [file NIHMS27331-supplement-suppdata.pdf]

## **SUPPLEMENTAL MATERIAL**

### **Supplemental Methods**

#### ***Diets***

In more detail the constituents of the high fat (HF) diet used were: 15% cocoa butter, 1% corn oil, 0.25% cholesterol, 40.5% sucrose, no cholic acid, total fat content 16% (Arieblok Diet W). The low fat (LF) semisynthetic reference diet contained: 54.3% glucose, 5% soya oil, no added cholesterol, total fat content 5.2% (Arieblok Reference Diet 4068.02). Both diets were purchased from Hope Farms, Woerden, Netherlands.

#### ***Lipoprotein isolation***

Human LDL (density 1.019-1.063g/mL) was isolated from plasma of healthy donors after overnight fasting by differential density ultracentrifugation.<sup>1</sup> Plasma was centrifuged at a density of 1.019g/mL at 53 000rpm for 16 hours at 5°C in a 70Ti fixed-angle rotor (Beckman Instruments, Inc.). The lower layer was adjusted to density 1.30g/mL, layered under KBr (density 1.006g/mL) and centrifuged in a 50Ti vertical rotor at 50 000rpm for 2½ hours at 8°C. The LDL band was removed, adjusted to density 1.063g/mL with KBr and centrifuged at 43 000rpm in a SW50.1 rotor at 8°C. The purified LDL was gel filtered on PD-10 columns (Pharmacia Biotech AB, Uppsala, Sweden) to remove KBr and sterile filtered. Protein content was determined by nanospectrophotometry. The purified LDL was stored at 4°C in the presence of 1mmol/L Na<sub>2</sub>EDTA and used within 2 weeks.

#### ***Modification of LDL***

Malondialdehyde (MDA) was synthesised by acid hydrolysis of malondialdehyde bis dimethylacetal (Sigma-Aldrich, Poole, UK).<sup>2,3</sup> In summary, 96µL 4M HCl, 704µL

malondialdehyde bis dimethylacetal was mixed with 3.2mL ddH<sub>2</sub>O and incubated for 10 minutes at 37°C. The reaction was neutralised by adjusting the pH to 7.4 with 1M NaOH. LDL was gel filtered to remove EDTA and incubated with 0.5M MDA at a ratio of 100µL MDA/mg LDL for 3 hours at 37°C. To generate copper oxidised-LDL (CuOxLDL), LDL diluted in PBS to concentration of 1mg/mL was mixed with 10µM CuSO<sub>4</sub> for 16 hours at 37°C. After oxidation MDA-LDL or CuOxLDL was gel filtered to remove residual MDA or CuSO<sub>4</sub>. To limit further modification, Na<sub>2</sub>EDTA was added to a concentration of 2.7mmol/L. Both MDA-LDL and CuOxLDL were used immediately. Agarose gel electrophoresis (Paragon Lipokit, Beckman) confirmed consistent oxidative modification of LDL.

#### ***Measurement of anticardiolipin and anti-β<sub>2</sub>glycoprotein I antibodies***

To measure anticardiolipin (aCL) antibodies, non-irradiated plates were coated overnight at 4°C with bovine cardiolipin in ethanol (1µg/well) and blocked with 10% adult bovine serum (ABS, Sigma-Aldrich). Serum samples were diluted 1:100 in 10% ABS. AP-conjugated anti-mouse IgG antibody (Southern Biotech) diluted 1:1000 in 10% ABS was applied and plates were developed with *p*-nitrophenol phosphate. For the measurement of anti-β<sub>2</sub>glycoprotein I antibodies, 96 well polystyrene plates (NUNC Maxisorp) were coated overnight at 4°C with purified human β<sub>2</sub>glycoprotein I (Crystal Chem, IL) in borate buffered saline, then blocked with 2% BSA. After incubation with serum samples diluted in 2% BSA, AP-conjugated goat anti-mouse IgG antibody was applied and plates developed with *p*-nitrophenol phosphate.

#### ***Renal analysis***

Urinalysis dipstick (Bayer) was used to screen for proteinuria and haematuria. Kidney portions were harvested at sacrifice prior to perfusion, processed in Bouin's solution for 2

hours, transferred to 70% ethanol, embedded in paraffin, stained with periodic acid-Schiff and scored for glomerulonephritis as previously described.<sup>4</sup>

***Specificity testing of antibody for both mouse IgG<sub>2a</sub> and IgG<sub>2c</sub>***

A standard ELISA was set up to measure levels of IgG<sub>2a</sub> and IgG<sub>2c</sub>, using a goat anti-mouse Ig antibody (Southern Biotech) as the capture antibody. Serial dilutions of commercial mouse IgG<sub>2a</sub> standard (HOPC-1 clone, Southern Biotech) or IgG<sub>2c</sub> reference serum (serum pool from C57BL/6 mice, Bethyl Laboratories) of known concentrations were added. The secondary antibody (alkaline phosphatase-conjugated polyclonal goat anti-mouse IgG<sub>2a</sub>, Southern Biotech cat. 1080-40) being tested was added. The substrate pNPP was used and plates read at 405nm after 30mins.

**Supplemental Table 1.** Baseline characteristics in *Ldlr*<sup>-/-</sup>, *Clqa.Ldlr*<sup>-/-</sup>, *sIgM.Ldlr*<sup>-/-</sup> and *Clqa.sIgM.Ldlr*<sup>-/-</sup> mice aged 22 weeks.

| Mouse genotype                       | Diet | n  | Final body weight (g) | Total cholesterol (mmol/L) | Total triglycerides (mmol/L) |
|--------------------------------------|------|----|-----------------------|----------------------------|------------------------------|
| <i>Ldlr</i> <sup>-/-</sup>           | LF   | 12 | 22.4±0.43             | 7.48±0.44                  | 1.58±0.22                    |
| <i>Clqa.Ldlr</i> <sup>-/-</sup>      | LF   | 12 | 24.0±0.48             | 8.61±0.56                  | 1.40±0.15                    |
| <i>sIgM.Ldlr</i> <sup>-/-</sup>      | LF   | 14 | 24.0±0.62             | 8.61±0.65                  | 1.67±0.16                    |
| <i>Clqa.sIgM.Ldlr</i> <sup>-/-</sup> | LF   | 10 | 24.4±0.40             | 7.80±0.77                  | 1.17±0.15                    |
| <i>Ldlr</i> <sup>-/-</sup>           | HF   | 12 | 25.7±1.05             | 39.6±1.34                  | 4.63±0.45                    |
| <i>Clqa.Ldlr</i> <sup>-/-</sup>      | HF   | 15 | 25.3±0.48             | 46.4±2.60                  | 6.02±0.62                    |
| <i>sIgM.Ldlr</i> <sup>-/-</sup>      | HF   | 15 | 23.7±0.55             | 40.7±2.05                  | 4.61±0.34                    |
| <i>Clqa.sIgM.Ldlr</i> <sup>-/-</sup> | HF   | 9  | 23.8±0.55             | 44.8±2.18                  | 4.74±0.61                    |

LF= low fat diet, HF= high fat diet. Values are expressed as mean±SEM. Differences between groups were not significant on either diet (statistical analysis by one-way ANOVA).

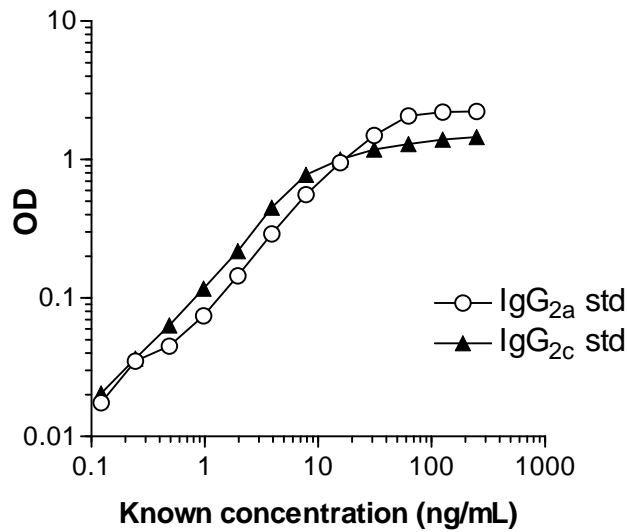

**Supplemental Figure 1. Testing of the specificity of secondary antibody (alkaline phosphatase-conjugated polyclonal goat anti-mouse IgG<sub>2a</sub>) for mouse IgG<sub>2a</sub> and IgG<sub>2c</sub>**

Graph shows the testing of the secondary antibody (alkaline phosphatase-conjugated goat anti-mouse IgG<sub>2a</sub>, Southern biotech cat. 1080-40) and its specificity for mouse IgG<sub>2a</sub> and IgG<sub>2c</sub>. The binding of 1080-40 antibody to both commercial IgG<sub>2a</sub> standard and IgG<sub>2c</sub> reference serum of known concentrations is demonstrated, showing that this particular batch of goat anti-mouse IgG<sub>2a</sub> antibody has similar specificity for both IgG<sub>2a</sub> and IgG<sub>2c</sub> below optical densities of ~1.0 for this ELISA setup. According to the manufacturer Southern Biotech, some batches of the 1080-40 antibody recognise both mouse IgG<sub>2a</sub> and IgG<sub>2c</sub>.

### Supplemental References

1. Wade DP, Knight BL, Soutar AK. Detection of the low-density-lipoprotein receptor with biotin-low-density lipoprotein. A rapid new method for ligand blotting. *Biochem J.* 1985;229:785-790.
2. Palinski W, Yla-Herttuala S, Rosenfeld ME, Butler SW, Socher SA, Parthasarathy S, Curtiss LK, Witztum JL. Antisera and monoclonal antibodies specific for epitopes generated during oxidative modification of low density lipoprotein. *Arteriosclerosis.* 1990;10:325-335.
3. Zhou X, Paulsson G, Stemme S, Hansson GK. Hypercholesterolemia is associated with a T helper (Th) 1/Th2 switch of the autoimmune response in atherosclerotic apo E-knockout mice. *J Clin Invest.* 1998;101:1717-1725.
4. Botto M, Dell'Agnola C, Bygrave AE, Thompson EM, Cook HT, Petry F, Loos M, Pandolfi PP, Walport MJ. Homozygous C1q deficiency causes glomerulonephritis associated with multiple apoptotic bodies. *Nat Genet.* 1998;19:56-59.
